# Supplementary material
Source: Springer Nature journal article supplement (https://www.springermedizin.de/resource/supplementary/13014_2011_565_MOESM6_ESM.pdf/9634132)

### Invasion

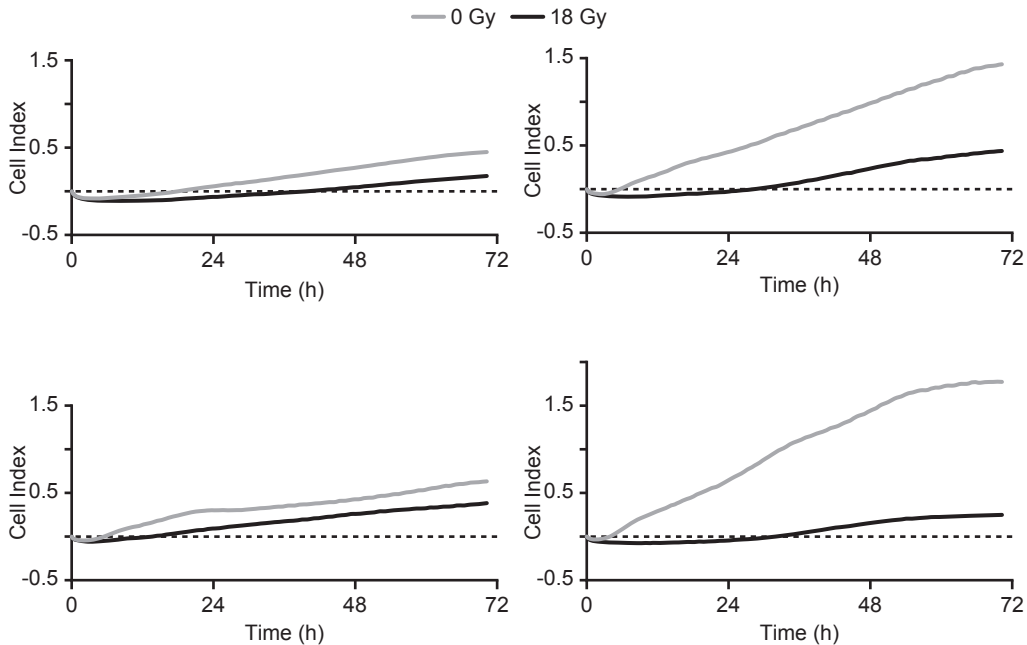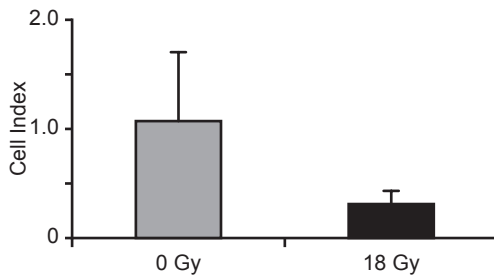

Supplement: MOESM6 [file 9634132]
